# Supplementary material for: Controllable construction of micro/nanostructured NiO arrays in confined microchannels via microfluidic chemical fabrication for highly efficient and specific absorption of abundant proteins
Source: Royal Society of Chemistry journal article supplement (doi:10.1039/c5tb00324e), 2015-01-01
Supplement: c5tb00324e1.pdf [file c5tb00324e1.pdf]

## Electronic Supplementary Information (ESI)

# Controllable Construction of Micro/nanostructured NiO in Confined Microchannels via Microfluidic Chemical Fabrication for Highly Efficient and Specific Absorption of Abundant Proteins

De Zhao,<sup>‡a</sup> Gang Wang,<sup>‡a</sup> Zhongyuan He,<sup>a</sup> Hongzhi Wang,<sup>\*a</sup> Qinghong Zhang<sup>a</sup> and Yaogang Li<sup>\*b</sup>

<sup>a</sup> State Key Laboratory for Modification of Chemical Fibers and Polymer Materials, College of Materials Science and Engineering, Donghua University, 201620 (People's Republic of China). Email: wanghz@dhu.edu.cn; Fax: +86-021-67792855; Tel: +86-021-67792881

<sup>b</sup> Engineering Research Center of Advanced Glasses Manufacturing Technology, MOE, Donghua University, 201620 (People's Republic of China). E-mail: yaogang\_li@dhu.edu.cn; Fax: +86-021-67792855; Tel: +86-021-67792526

<sup>‡</sup>These authors contributed equally to this work.

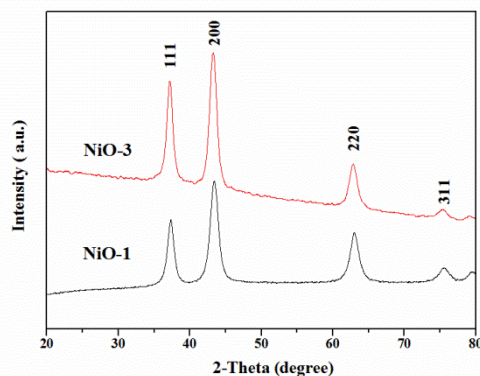

**Fig. S1** XRD patterns of the as-prepared NiO scraped off the inner surface of capillary microchannels after calcined at 500 °C for 2 h.

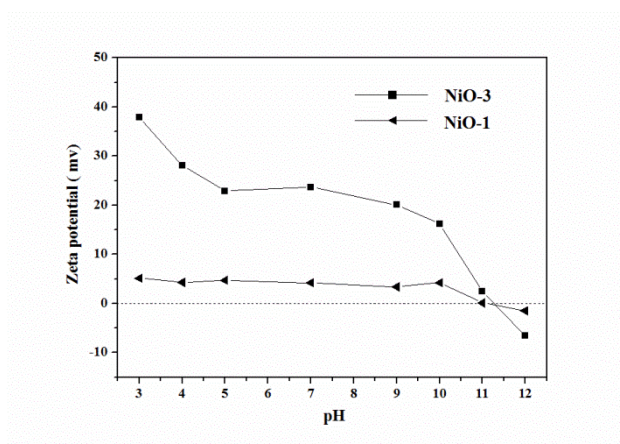

**Fig. S2** Zeta-potential plots of the as-prepared NiO after calcined at 500 °C for 2 h. as a function of the pH of buffer solution.

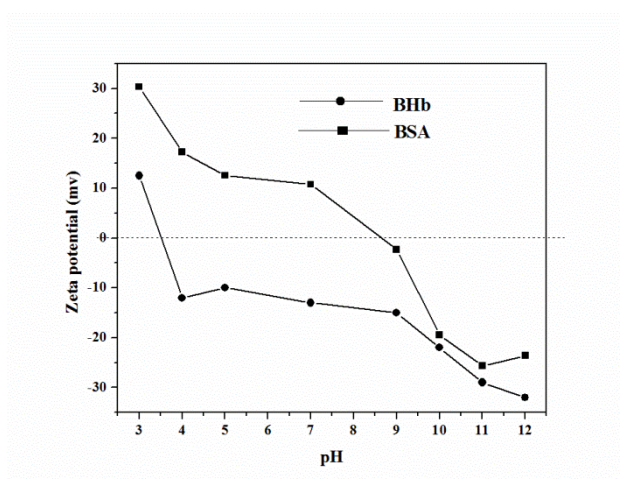

**Fig. S3** Zeta-potential plots of BSA and BHB as a function of the pH of the buffer solution.

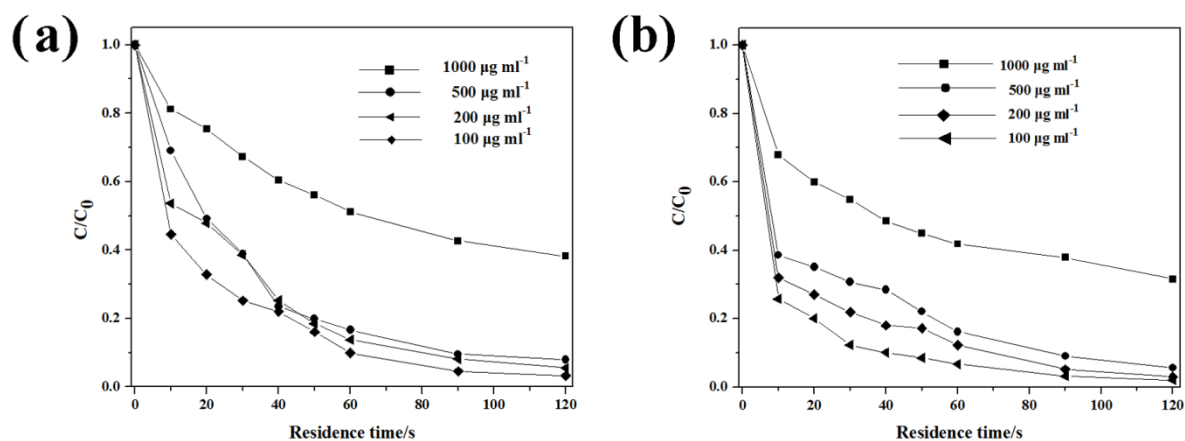

**Fig. S4** Adsorption capture of proteins with different concentrations by NiO-3-modified capillary microchannels versus different RTs; (a) BSA; (b) BHB.

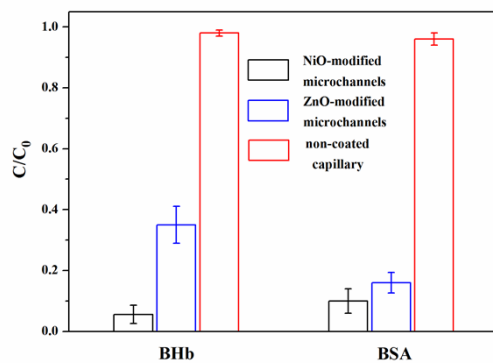

**Fig. S5** Absorption capture of proteins ( $500 \mu\text{g mL}^{-1}$ ) with NiO-3-modified microchannels, ZnO-modified microchannels and non-coated capillary.

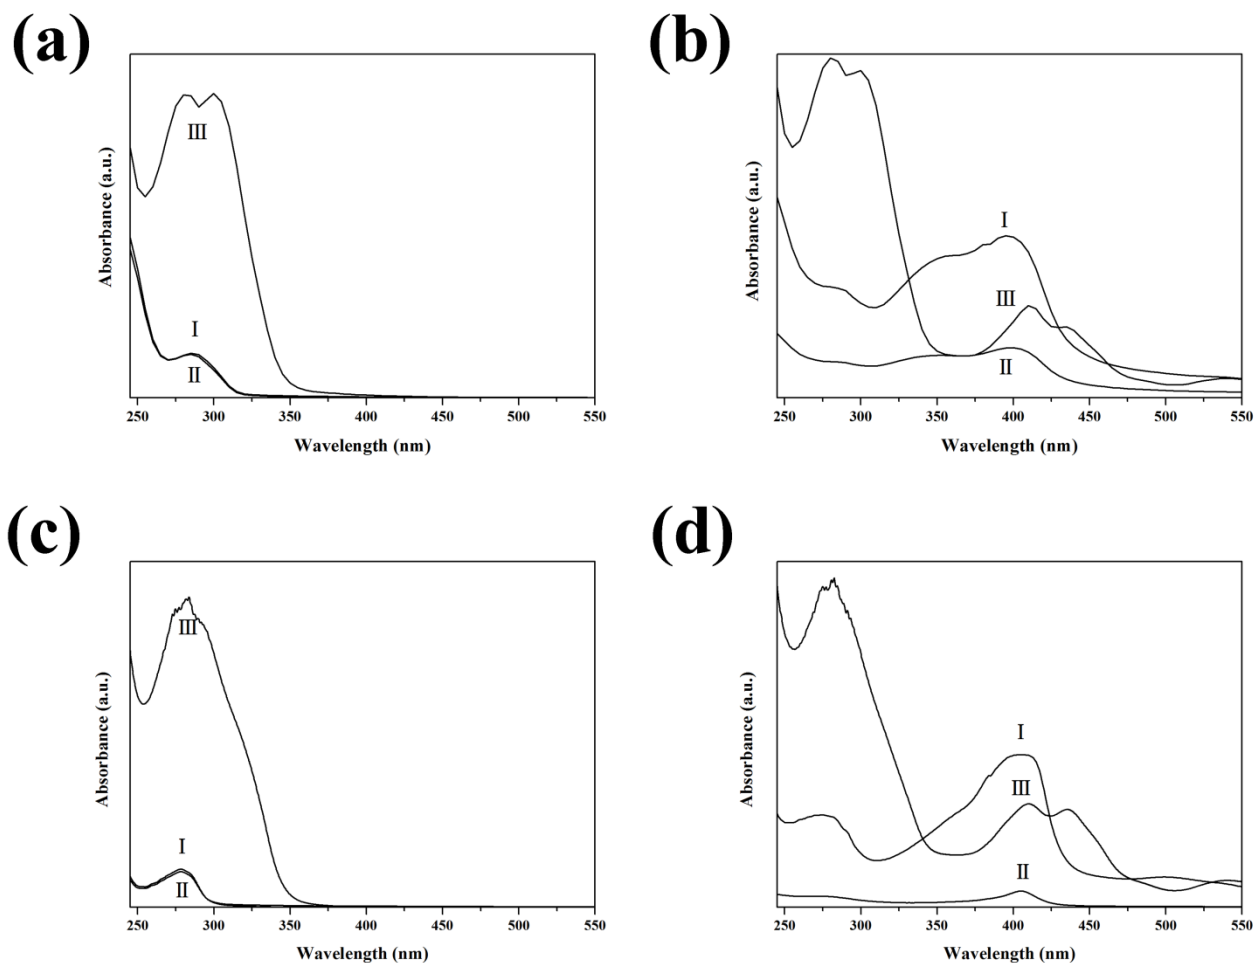

**Fig. S6** UV-Vis spectra of the samples obtained in absorption-desorption process of single protein solution ( $500 \mu\text{g mL}^{-1}$ ) under two different conditions. (a) BSA, 1 mM KCl, pH=12; (b) Bhb, 1 mM KCl,

pH=12; (c) BSA, 200 mM KCl, pH=7; (d) BHb, 200 mM KCl, pH=7. Curve “I” “II” “III” in the each map is the UV-Vis spectra of the samples before absorption, after absorption and after elution with 0.1 g mL<sup>-1</sup> imidazole solution respectively.
